# Supplementary material
Source: PubMed Central journal article supplement (PMC4640981)
Supplement: NIHMS683325-supplement-01.pdf [file NIHMS683325-supplement-01.pdf]

377 **Supplemental Table 1: Antimicrobials used for Outpatient Parenteral Antibiotic Therapy (OPAT)**  
 378 **patients at any time stratified by presence or absence of eosinophilia.**

|                                      | All (N=824)     | Eosinophilia<br>(N=210) | No Eosinophilia<br>(N=614) | P-value <sup>†</sup> |
|--------------------------------------|-----------------|-------------------------|----------------------------|----------------------|
| <i>Antibiotic<sup>‡</sup>, N (%)</i> |                 |                         |                            |                      |
| Cephalosporins                       | 377 (46)        | 86 (41)                 | 291 (47)                   | 0.11                 |
| <b>Vancomycin</b>                    | <b>332 (40)</b> | <b>105 (50)</b>         | <b>227 (37)</b>            | <b>0.001</b>         |
| Penicillins                          | 219 (27)        | 63 (30)                 | 156 (25)                   | 0.21                 |
| <b>Metronidazole</b>                 | <b>135 (16)</b> | <b>24 (11)</b>          | <b>111 (18)</b>            | <b>0.02</b>          |
| Flouroquinolones                     | 130 (16)        | 32 (15)                 | 98 (16)                    | 0.91                 |
| <b>Rifampin</b>                      | <b>121 (15)</b> | <b>45 (21)</b>          | <b>76 (12)</b>             | <b>0.002</b>         |
| Daptomycin                           | 74 (9)          | 26 (12)                 | 48 (8)                     | 0.05 <sup>§</sup>    |
| Carbapenems                          | 69 (8)          | 21 (10)                 | 48 (8)                     | 0.32                 |
| Fluconazole                          | 47 (6)          | 12 (6)                  | 35 (6)                     | >0.50                |
| Linezolid                            | 47 (6)          | 18 (9)                  | 29 (5)                     | 0.06                 |
| Aminoglycosides                      | 30 (4)          | 8 (4)                   | 22 (4)                     | >0.50                |
| Tetracyclines                        | 21 (3)          | 5 (2)                   | 16 (3)                     | >0.50                |
| Clindamycin                          | 9 (1)           | 4 (2)                   | 5 (<1)                     | 0.24                 |
| Micafungin                           | 7 (<1)          | 1 (<1)                  | 6 (1)                      | >0.50                |
| Voriconazole                         | 7 (<1)          | 2 (1)                   | 5 (<1)                     | >0.50                |
| Aztreonam                            | 6 (<1)          | 2 (1)                   | 4 (<1)                     | >0.50                |
| Amphotericin B                       | 6 (<1)          | 2 (1)                   | 4 (<1)                     | >0.50                |
| Macrolides                           | 6 (<1)          | 2 (1)                   | 4 (<1)                     | >0.50                |
| TMP/SMX                              | 5 (<1)          | 1 (<1)                  | 4 (<1)                     | >0.50                |
| Flucytosine                          | 2 (<1)          | 1 (<1)                  | 1 (<1)                     | 0.45                 |

|              | All (N=824) | Eosinophilia<br>(N=210) | No Eosinophilia<br>(N=614) | P-value <sup>†</sup> |
|--------------|-------------|-------------------------|----------------------------|----------------------|
| Ganciclovir  | 2 (<1)      | 0 (0)                   | 2 (<1)                     | >0.50                |
| Cefoxotin    | 1 (<1)      | 0 (0)                   | 1 (<1)                     | >0.50                |
| Ethambutol   | 1 (<1)      | 1 (<1)                  | 0 (0)                      | 0.25                 |
| Foscarnet    | 1 (<1)      | 0 (0)                   | 1 (<1)                     | >0.50                |
| Posaconazole | 1 (<1)      | 0 (0)                   | 1 (<1)                     | >0.50                |

379 *Abbreviations:* TMP/SMX: trimethoprim/sulfamethoxazole

380 <sup>†</sup> Fisher's exact test.

381 <sup>‡</sup> Proportion of patients using antibiotics anytime during OPAT follow-up

382 <sup>§</sup> For Daptomycin, P=0.0508

383

384

385

386

387

388

389

390

391

392

393

394

395

396

397
